# Supplementary material for: Using optical tweezing to control phase separation and nucleation near a liquid–liquid critical point
Source: Royal Society of Chemistry journal article supplement (doi:10.1039/c9sm01297d), 2019-01-01
Supplement: c9sm01297d1.pdf [file c9sm01297d1.pdf]

## Supplementary information for: Using optical tweezing to control phase separation and nucleation near a liquid–liquid critical point

Finlay Walton and Klaas Wynne  
School of Chemistry, University of Glasgow, UK

### UV-vis of nitrobenzene and decane

The UV-vis spectra of nitrobenzene and decane in FIG. 17 show no combination or overtone bands at the laser wavelength of 785 nm. Nevertheless, we can use the absorbance as part of a heating calculation, but first subtracting the contribution from the cuvette. Three cuvette path lengths were used (1, 2 and 10 mm) in order to estimate the contribution to the absorption of the cuvette. The calculated cuvette absorbance of 0.0293 was used to calculate the heat term  $Q$  in Eq. \\* MERGEFORMAT (20).

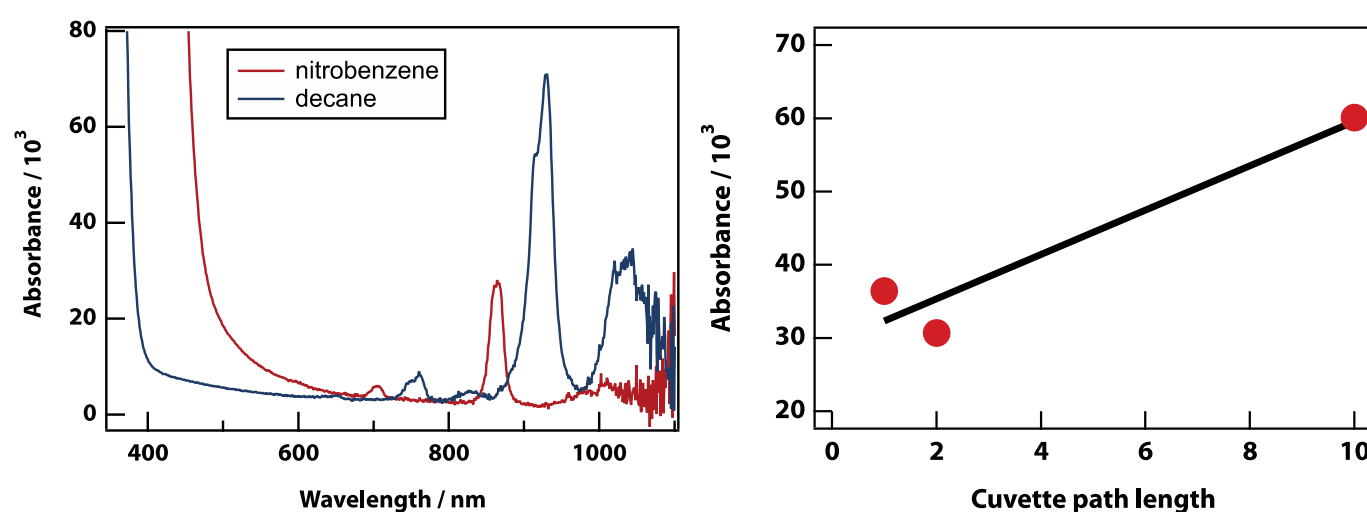

**FIG. S11.** (left) Nitrobenzene and decane both show no combination or overtone bands at 785 nm – the peak wavelength of the diode laser. (right) The contribution to the UV-vis signal of the cuvette glass was found to be 0.0293.
